# Supplementary material for: Controllable synthesis of aluminum doped peony-like α-Ni(OH)2with ultrahigh rate capability for asymmetric supercapacitors
Source: Royal Society of Chemistry journal article supplement (doi:10.1039/c9ra00883g), 2019-01-01
Supplement: c9ra00883g1.pdf [file c9ra00883g1.pdf]

# **Controllable synthesis of aluminum doped peony-like $\alpha$ - $\text{Ni}(\text{OH})_2$ with ultrahigh rate capability for asymmetric supercapacitors**

Jinying Wei<sup>a,1</sup>, Daping Qiu<sup>a,1</sup>, Min Li<sup>a,\*</sup>, Zhenyu Xie<sup>a</sup>, Ang Gao<sup>a</sup>, Hongru Liu<sup>b,\*</sup>, Suhong

Yin<sup>b</sup>, Dongsheng Yang<sup>b</sup> and Ru Yang<sup>a,\*</sup>

a. State Key Laboratory of Chemical Resource Engineering, Beijing Key Laboratory of Electrochemical Process and Technology for Materials, Beijing University of Chemical Technology, Beijing 100029, China.

b. Central Research Institute of China Chemical Science and Technology Co.,Ltd., Beijing 100029, China.

<sup>1</sup>These authors contributed equally to this work.

\* Corresponding authors:

E-mail: [limin9936@163.com](mailto:limin9936@163.com). Fax: +86 10 64436736

E-mail: [315932577@qq.com](mailto:315932577@qq.com).

E-mail: [ruyang@mail.buct.edu.cn](mailto:ruyang@mail.buct.edu.cn). Fax: +86 10 64436736

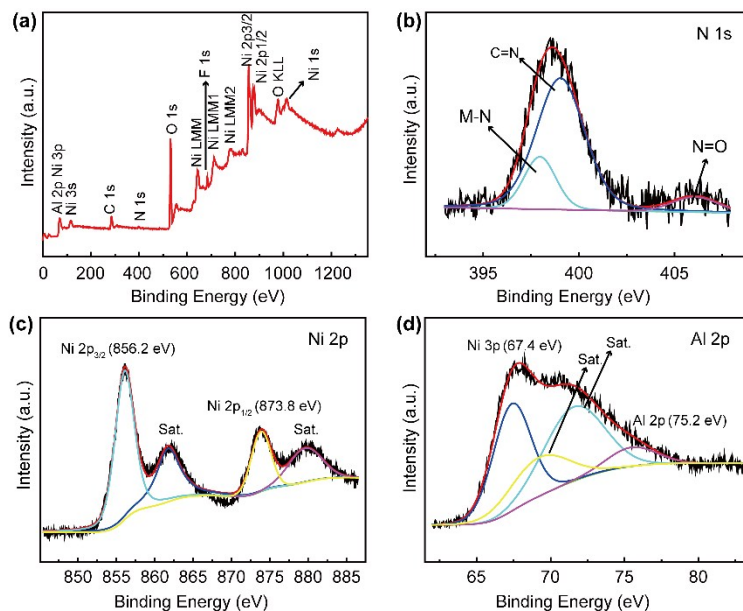

Figure. S1 (a) XPS spectra of as-synthesized NIA-0.1 (b-d) XPS survey scan of N 1s, Ni 2p, Al 2p regions, respectively.

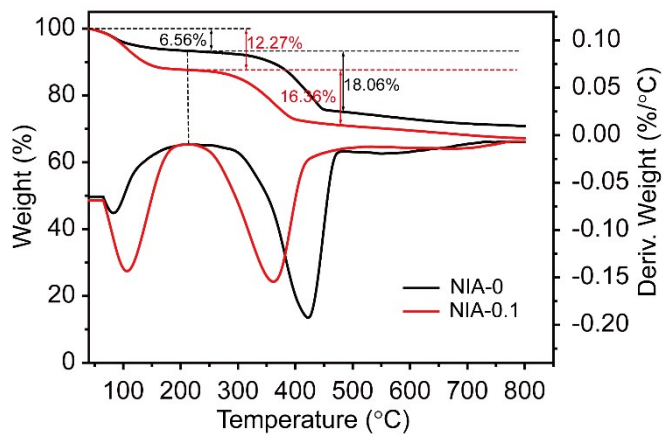

Figure. S2 TGA and DTG of NIA-0 and NIA-0.1 tested in air.

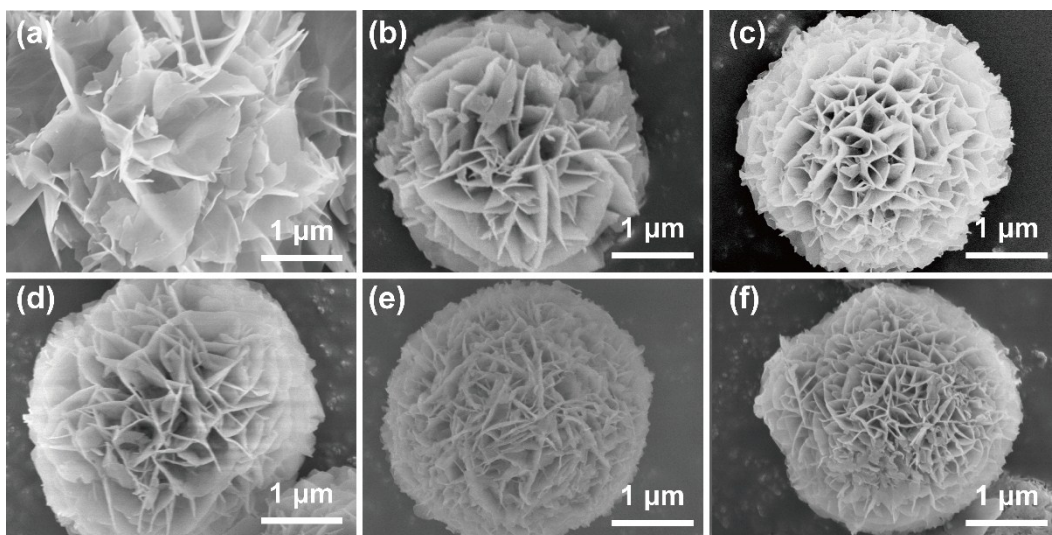

Figure. S3 SEM images of as-synthesized NIA-*x*: (a) NIA-0, (b) NIA-0.05, (c) NIA-0.1, (d) NIA-0.15, (e) NIA-0.2, (f) NIA-0.25.

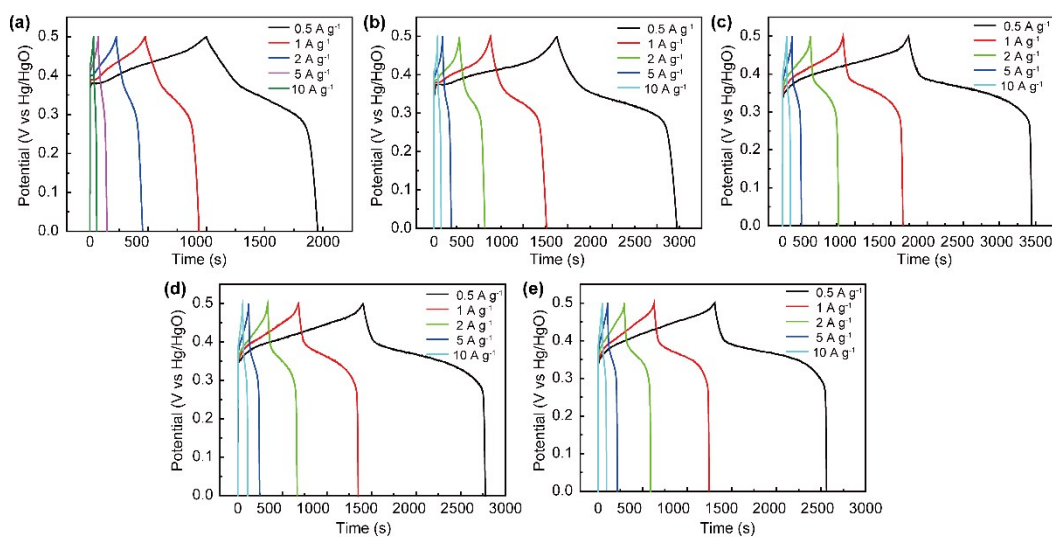

Figure. S4 GCD curves of as-synthesized NIA-*x* at different current densities: (a) NIA-0, (b) NIA-0.05, (c) NIA-0.1, (d) NIA-0.15, (e) NIA-0.2, (f) NIA-0.25.

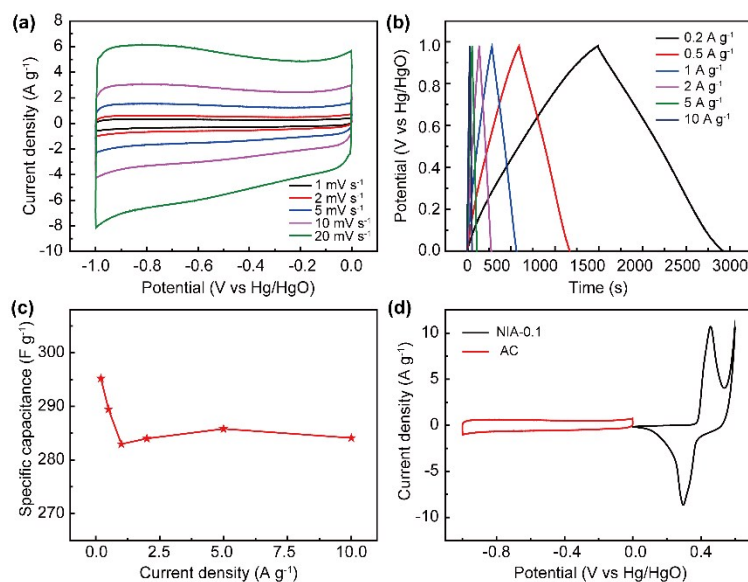

Figure. S5 (a) CV curves of HCP at scan rates from 1 to 20  $\text{mV s}^{-1}$ . (b) GCD curves of HCP at different current densities. (c) Specific capacitance values of HCP at different current densities. (d) Potential windows of NIA-0.1 and HCP at a scan rate of 2  $\text{mV s}^{-1}$ .
